# Supplementary material for: Graph-based Nanopore Adaptive Sampling with GNASTy enables sensitive pneumococcal serotyping in complex samples
Source: bioRxiv preprint, doi:10.1101/2024.02.11.579857, version 1 (2024-02-12)
Supplement: Supplementary File 2 [file 579857_file02.xlsx]

## Sheet: Contiguity
Experiment

## Sheet: Read_to_assembly_alignment
Experiment

## Sheet: Assembly_to_reference_alignment
Experiment
